# Supplementary material
Source: PubMed Central journal article supplement (PMC6405805)
Supplement: 802799_Supplemental_Table_1.pdf [file 802799_Supplemental_Table_1.pdf]

**Supplemental Table 1** Description of Study Measures

| <b>Variable</b>      | <b>Data Sources</b>                                                                                     | <b>Timing</b>                                                                                                                                      | <b>Rationale and Coding</b>                                                                                                                                                                                                                                                                                                                                                                                                                                                                                                                                                                                                                                                                                                                         |
|----------------------|---------------------------------------------------------------------------------------------------------|----------------------------------------------------------------------------------------------------------------------------------------------------|-----------------------------------------------------------------------------------------------------------------------------------------------------------------------------------------------------------------------------------------------------------------------------------------------------------------------------------------------------------------------------------------------------------------------------------------------------------------------------------------------------------------------------------------------------------------------------------------------------------------------------------------------------------------------------------------------------------------------------------------------------|
| Age                  | Date of birth from Registered Persons Data Base (RPDB) <sup>1</sup>                                     | Most recent ED contact, year                                                                                                                       | To account for potential differences between cases and controls, <sup>2</sup> the following categories were selected to improve precision without altering direction of findings:<br>10 to 15 years (reference)<br>16 to 17 years<br>18 to 25 years                                                                                                                                                                                                                                                                                                                                                                                                                                                                                                 |
| Community Size       | RPDB postal code, Census population data and Statistics Canada Postal Code Conversion File <sup>3</sup> | Most recent ED contact, year. When year was 2003 used census 2001, when year was 2004-2008 used census 2006 when year > 2008 used census 2011 data | To account for potential differences between cases and controls on rural residence, <sup>2</sup> individuals were assigned to their dissemination area (DA): a small, relatively stable geographic unit and the smallest standard geographic area for which census data are produced. Rural residence was defined according to Statistics Canada's recommended definition of rural and small town, i.e., population <10,000. <sup>4</sup> The population of the community in which the individual resided was then assigned and categorized to improve precision without altering direction of the findings:<br>1,500,000+<br>10,000-1,499,999 (reference)<br>< 10,000 (rural)                                                                      |
| Neighbourhood Income | As above                                                                                                | As above                                                                                                                                           | To account for potential differences between cases and controls on SES, <sup>5</sup> the mean income per person equivalent (household income, adjusted for household size) was calculated for each DA (described above). Then, DAs were ranked according to this measure by city, town or rural/small town area in which the dissemination area was located. Next, the population of the city, town or rural/small town area was divided into approximate fifths to create community-specific income quintiles. Individuals were assigned to the income quintile in which they resided: 1 (lowest) to 5 (highest) or missing. To improve precision without altering the direction of the findings, income quintiles were dichotomized: 1 vs. 2 to 5 |
| Type of ED contact   | National Ambulatory Care Reporting System (NACRS) <sup>6</sup>                                          | Most recent ED contact, date                                                                                                                       | The type of ED contact was dichotomized (and youth, stratified) into two categories given the low overlap (5%) between a mental health or other problem according to the presence of an ICD-10-CA diagnostic code, chapters 1 to 20. <sup>7</sup> Previous chart abstraction indicates these diagnoses are quite reliable. <sup>8</sup>                                                                                                                                                                                                                                                                                                                                                                                                             |

|                                      |       |                              |                                                                                                                                                                                                                                                                                                                                                                                                                                                                                                                                                   |
|--------------------------------------|-------|------------------------------|---------------------------------------------------------------------------------------------------------------------------------------------------------------------------------------------------------------------------------------------------------------------------------------------------------------------------------------------------------------------------------------------------------------------------------------------------------------------------------------------------------------------------------------------------|
| 1) Mental health problem             |       |                              | Mental disorders F00-F99 (chapter 5) and/or a self-inflicted poisoning or injury X60 to X84 (in chapter 20)                                                                                                                                                                                                                                                                                                                                                                                                                                       |
| 2) 'Other' only problem              |       |                              | All remaining (non-mental health) ICD-10-CA diagnostic codes.                                                                                                                                                                                                                                                                                                                                                                                                                                                                                     |
| 1) Mental health problem type        | NACRS | Most recent ED contact, date | This type of ED contact was specified by the presence of the following codes:                                                                                                                                                                                                                                                                                                                                                                                                                                                                     |
| Alcohol use disorder                 |       |                              | F10 =yes; else=no                                                                                                                                                                                                                                                                                                                                                                                                                                                                                                                                 |
| Other Substance Use                  |       |                              | F11-F19 =yes; else=no                                                                                                                                                                                                                                                                                                                                                                                                                                                                                                                             |
| Schizophrenia/Schizotypal/Delusional |       |                              | F20-F29 =yes; else=no                                                                                                                                                                                                                                                                                                                                                                                                                                                                                                                             |
| Mood disorders                       |       |                              | F30-F39 =yes; else=no                                                                                                                                                                                                                                                                                                                                                                                                                                                                                                                             |
| Anxiety disorders                    |       |                              | F40-F48 =yes; else=no                                                                                                                                                                                                                                                                                                                                                                                                                                                                                                                             |
| Other mental disorders               |       |                              | F00-F09; F50-F99 =yes; else=no                                                                                                                                                                                                                                                                                                                                                                                                                                                                                                                    |
| Self-inflicted poisoning             |       |                              | X60-X69 =yes; else=no                                                                                                                                                                                                                                                                                                                                                                                                                                                                                                                             |
| Self-inflicted cut/pierce            |       |                              | X78=yes; else=no                                                                                                                                                                                                                                                                                                                                                                                                                                                                                                                                  |
| Self-inflicted other                 |       |                              | X70-X77; X79-X84=yes; else=no                                                                                                                                                                                                                                                                                                                                                                                                                                                                                                                     |
| Both mental & 'other' health problem |       |                              | Any mental health problem code (above) and an 'other' (non-mental health) problem code=yes; else=no                                                                                                                                                                                                                                                                                                                                                                                                                                               |
| 2) 'Other' health problem type       | NACRS | Most recent ED contact, date | This type of ED contact was specified according to injuries and poisonings not self-inflicted <sup>9</sup> into the following dichotomous categories:                                                                                                                                                                                                                                                                                                                                                                                             |
| Unintentional injury                 |       |                              | S00-T35 (in chapter 19) =yes; else=no                                                                                                                                                                                                                                                                                                                                                                                                                                                                                                             |
| Unintentional poisoning              |       |                              | T36-T65 (in chapter 19) =yes; else=no                                                                                                                                                                                                                                                                                                                                                                                                                                                                                                             |
| Assault                              |       |                              | X85-Y09 (in chapter 20) =yes; else=no                                                                                                                                                                                                                                                                                                                                                                                                                                                                                                             |
| Undetermined injury or poisoning     |       |                              | Y10-Y34 (in chapter 20) =yes; else=no                                                                                                                                                                                                                                                                                                                                                                                                                                                                                                             |
| Reference = 'no'                     |       |                              | Note: 'else=no' refers to any 'other' (non-mental) health problem code. Codes V01-X59 (in chapter 20) are excluded as they overlapped with their respective injury or poisoning codes noted above (chapter 19). The decision to collapse the remaining codes together was made after comparing their frequencies in each of the ICD-10-CA chapters (1 to 4; 6 to 18) and T66-98 (in chapter 19) and Y35-98 (in chapter 20) in cases and controls by sex. There were no significant differences or cell sizes were suppressed for privacy reasons. |
| Timing of ED contact                 | NACRS | Most recent ED contact, date | Timing of presentation was measured to account for potential differences between cases and controls. Youth who self-harm vary by the weekday and month they present to hospital <sup>10</sup> and tend to present outside office hours. <sup>11, 12</sup> Also, self-harm rates changed over time during the study years. <sup>13, 14</sup>                                                                                                                                                                                                       |
| Registration time                    |       |                              | 9 am to 5 pm; after 5 pm to midnight vs. after midnight but before 9 am                                                                                                                                                                                                                                                                                                                                                                                                                                                                           |
| Day of week                          |       |                              | Weekday (Monday through Friday) vs. Weekend (Saturday and Sunday)                                                                                                                                                                                                                                                                                                                                                                                                                                                                                 |
| Month of year                        |       |                              | January, February, March, April, May, June, July, August, September, October vs. November to December. The last two                                                                                                                                                                                                                                                                                                                                                                                                                               |

|                           |                                                   |                                                         |                                                                                                                                                                                                                                                                                                                                                                                                                                                                                                                                                                                                                                                              |
|---------------------------|---------------------------------------------------|---------------------------------------------------------|--------------------------------------------------------------------------------------------------------------------------------------------------------------------------------------------------------------------------------------------------------------------------------------------------------------------------------------------------------------------------------------------------------------------------------------------------------------------------------------------------------------------------------------------------------------------------------------------------------------------------------------------------------------|
|                           |                                                   |                                                         | months were collapsed for precision without altering direction of the results.                                                                                                                                                                                                                                                                                                                                                                                                                                                                                                                                                                               |
| Year                      |                                                   |                                                         | Fiscal years were dichotomized as: the last two study years 12/13 and 13/14 vs. 02/03 to 11/12 to improve precision without altering direction of the results.                                                                                                                                                                                                                                                                                                                                                                                                                                                                                               |
| Acuity of ED contact:     | NACRS                                             | Most recent ED contact, date                            | Acuity was measured to account for potential differences between cases and controls. Youth who self-harm have higher acuity presentations than their peers. <sup>15</sup> The Canadian Triage and Acuity Scale (CTAS) is a validated scale <sup>16</sup> given to patients on arrival to the ED (or shortly thereafter) to prioritize their care. The CTAS has been found to have high inter-observer agreement. <sup>17, 18</sup> The three lowest categories were collapsed into one to improve precision without altering direction of findings.<br>1=Resuscitation<br>2=Emergent<br>3=Urgent,4= Semi-urgent,<br>5= Non-urgent (levels 3 to 5: reference) |
| Prior medical care:       |                                                   |                                                         | To account for potential differences between cases and controls at baseline prior medical care was defined as:                                                                                                                                                                                                                                                                                                                                                                                                                                                                                                                                               |
| Mental health contact     | NACRS, Ontario Health Insurance Program (OHIP)    | In the 30 days before the most recent ED contact, date  | Mental healthcare was classified into three mutually exclusive, hierarchical categories indicating the level of care received: <sup>2</sup><br>ED and/or inpatient<br>Outpatient only<br>None (reference)                                                                                                                                                                                                                                                                                                                                                                                                                                                    |
| ED contact for any reason | NACRS                                             | In the 365 days before the most recent ED contact, date | Coded yes vs. no                                                                                                                                                                                                                                                                                                                                                                                                                                                                                                                                                                                                                                             |
| Days to death             | NACRS and the Ontario Office of the Chief Coroner | Most recent ED contact, date and death date             | Calculated among cases to measure the time to intervene. <sup>19</sup>                                                                                                                                                                                                                                                                                                                                                                                                                                                                                                                                                                                       |

### Supplementary Table 1 References

1. Iron K, Zagorski B, Sykora K et al. Living and dying in Ontario: An opportunity for improved health information. ICES Investigative Report [Internet]. Toronto, Ontario: ICES; 2008. Available from: <https://www.ices.on.ca/Publications/Atlases-and-Reports/2008/Living-and-dying-in-Ontario>
2. Rhodes AE, Boyle MH, Bridge JA et al. The medical care of male and female youth who die by suicide: A population-based case control study. *The Canadian Journal of Psychiatry*. 2018; 63, 161-169.
3. Wilkins R. PCCF + Version 5E User's Guide (Geocodes/PCCF) Automated Geographic Coding based on the Statistics Canada Postal Code Conversion Files. 2009.
4. du Plessis V, Beshiri R, Bollman R. Definitions of rural. Statistics Canada, Rural and Small Town Canada Analysis Bulletin, 2001.
5. Page A, Morrell S, Hobbs C et al. Suicide in young adults: psychiatric and socio-economic factors from a case-control study. *BMC Psychiatry*. 2014;14, 1-9.
6. Canadian Institutes for Health Information (CIHI). Emergency and Ambulatory Care. [Internet] Ottawa, Ontario; 2017. Available from: <https://www.cihi.ca/en/emergency-and-ambulatory-care>
7. Canadian Institutes for Health Information (CIHI). International Classification of Diseases and Related Health Problems, Tenth Revision, Volume 1, Tabular List. [Internet] Ottawa, Ontario; 2009. Available from: [https://www.cihi.ca/en/icd\\_10\\_ca\\_vol1\\_2009\\_en.pdf](https://www.cihi.ca/en/icd_10_ca_vol1_2009_en.pdf)
8. Canadian Institutes for Health Information (CIHI). CIHI data quality study of Ontario emergency department visits for 2004-2005: Volume II of IV - Main study findings. Ottawa, Ontario; 2008.
9. Zambon F, Laflamme L, Spolaore P et al. Youth suicide: An insight into previous hospitalisation for injury and sociodemographic conditions from a nationwide cohort study. *Injury Prevention*. 2011;17:176-181.
10. Hawton K, Hall S, Simkin S et al. Deliberate self-harm in adolescents: a study of characteristics and trends in Oxford, 1990-2000. *Journal of Child Psychology and Psychiatry*. 2003; 44, 1191-1198.
11. Rhodes A, Bethell J, Spence J et al. Age-sex differences in medicinal self-poisonings. *Social Psychiatry & Psychiatric Epidemiology*. 2008; 43, 642-652.
12. Gunnell D, Bennewith O, Peters T et al. The epidemiology and management of self-harm amongst adults in England. *Journal of Public Health*. 2004; 27, 67-73.
13. Rhodes A, Bethell J, Carlisle C et al. Time trends in suicide-related behaviours in girls and boys. *Canadian Journal of Psychiatry*. 2014; 59, 152-159.

14. Rhodes A, Lu H, Skinner R. Time trends in medically serious suicide-related behaviours in boys and girls. *Canadian Journal of Psychiatry*. 2014; 59, 556-560.
15. Bethell J, Bondy S, Lou W et al. Emergency department presentations for self-harm among Ontario youth. *Canadian Journal of Public Health*. 2013; 104,124-130.
16. Stenstrom R, Grafstein EJ, Innes GD et al. The predictive validity of the Canadian Triage and Acuity Scale (CTAS). *Academic Emergency Medicine*. 2009; 10, 512
17. Beveridge R, Ducharme J, Janes L et al. Reliability of the Canadian emergency department triage and acuity scale: interrater agreement. *Annals of Emergency Medicine*. 1999; 34, 155-159.
18. Manos D, Petrie DA, Beveridge RC et al. Inter-observer agreement using the Canadian Emergency Department Triage and Acuity Scale. *Canadian Journal of Emergency Medicine*. 2002; 4, 16-22.
19. Rhodes AE, Khan S, Boyle MH et al. Sex differences in suicides among children and youth: The potential impact of help-seeking behaviour. *Canadian Journal of Psychiatry*. 2013; 58, 274-282.
